# Supplementary material for: Enteric neural stem cell transplant restores gut motility in mice with Hirschsprung disease
Source: PubMed Central journal article supplement (PMC11385093; doi:10.1172/jci.insight.179755), 2024-07-23
Supplement: jciinsight-9-179755-s143.pdf [file jciinsight-9-179755-s143.pdf]

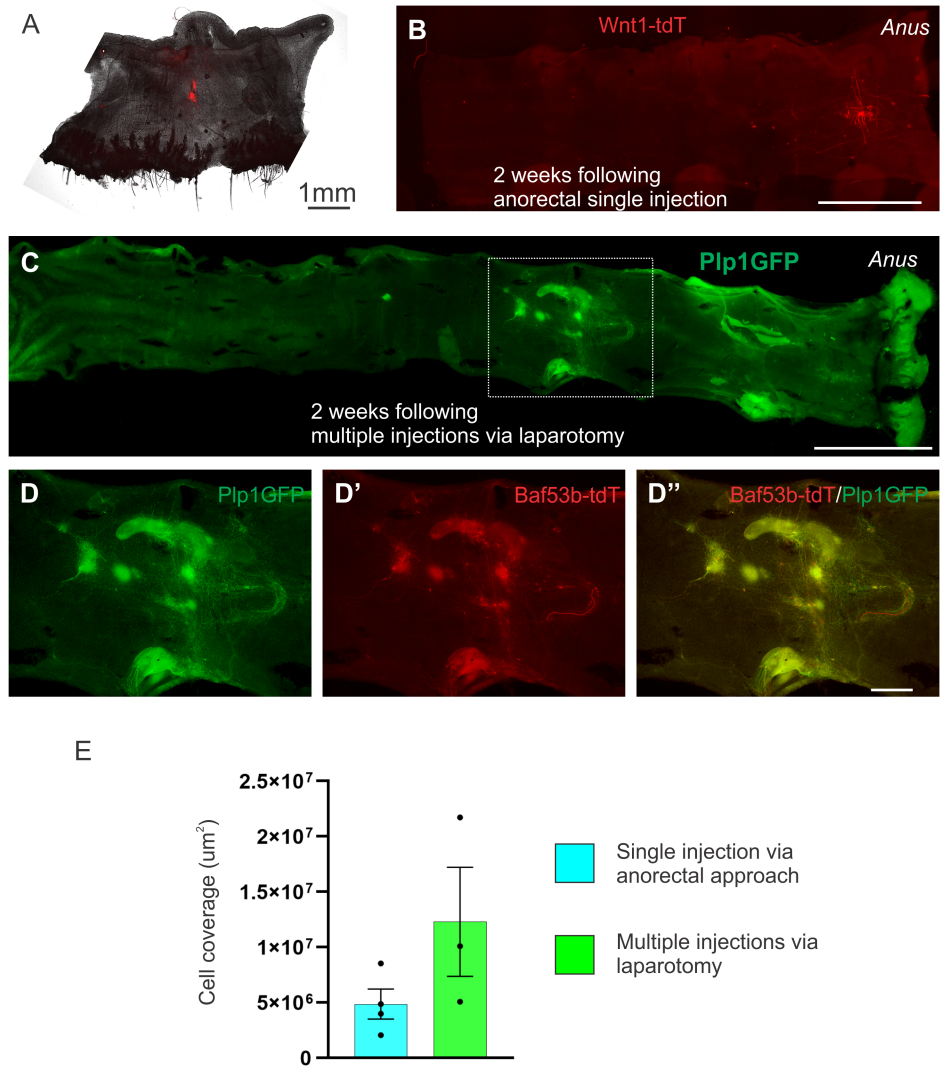

**Supplementary Figure 1. Comparisons between single and multiple injections of ENSCs by two different approaches to Ednrb KO mice.**

Transplanted cells were observed 2 weeks following single injection of ENSCs through an anorectal approach (A and B) or multiple injections via laparotomy (C). Dotted box in C was magnified in D-D". Area of cell coverage was measured (E).

Data shown as mean ± SEM. \**p* < 0.05 by Student's *t*-test.

Scale bars: 1 mm (B, D), 3 mm (A), and 5 mm (C).

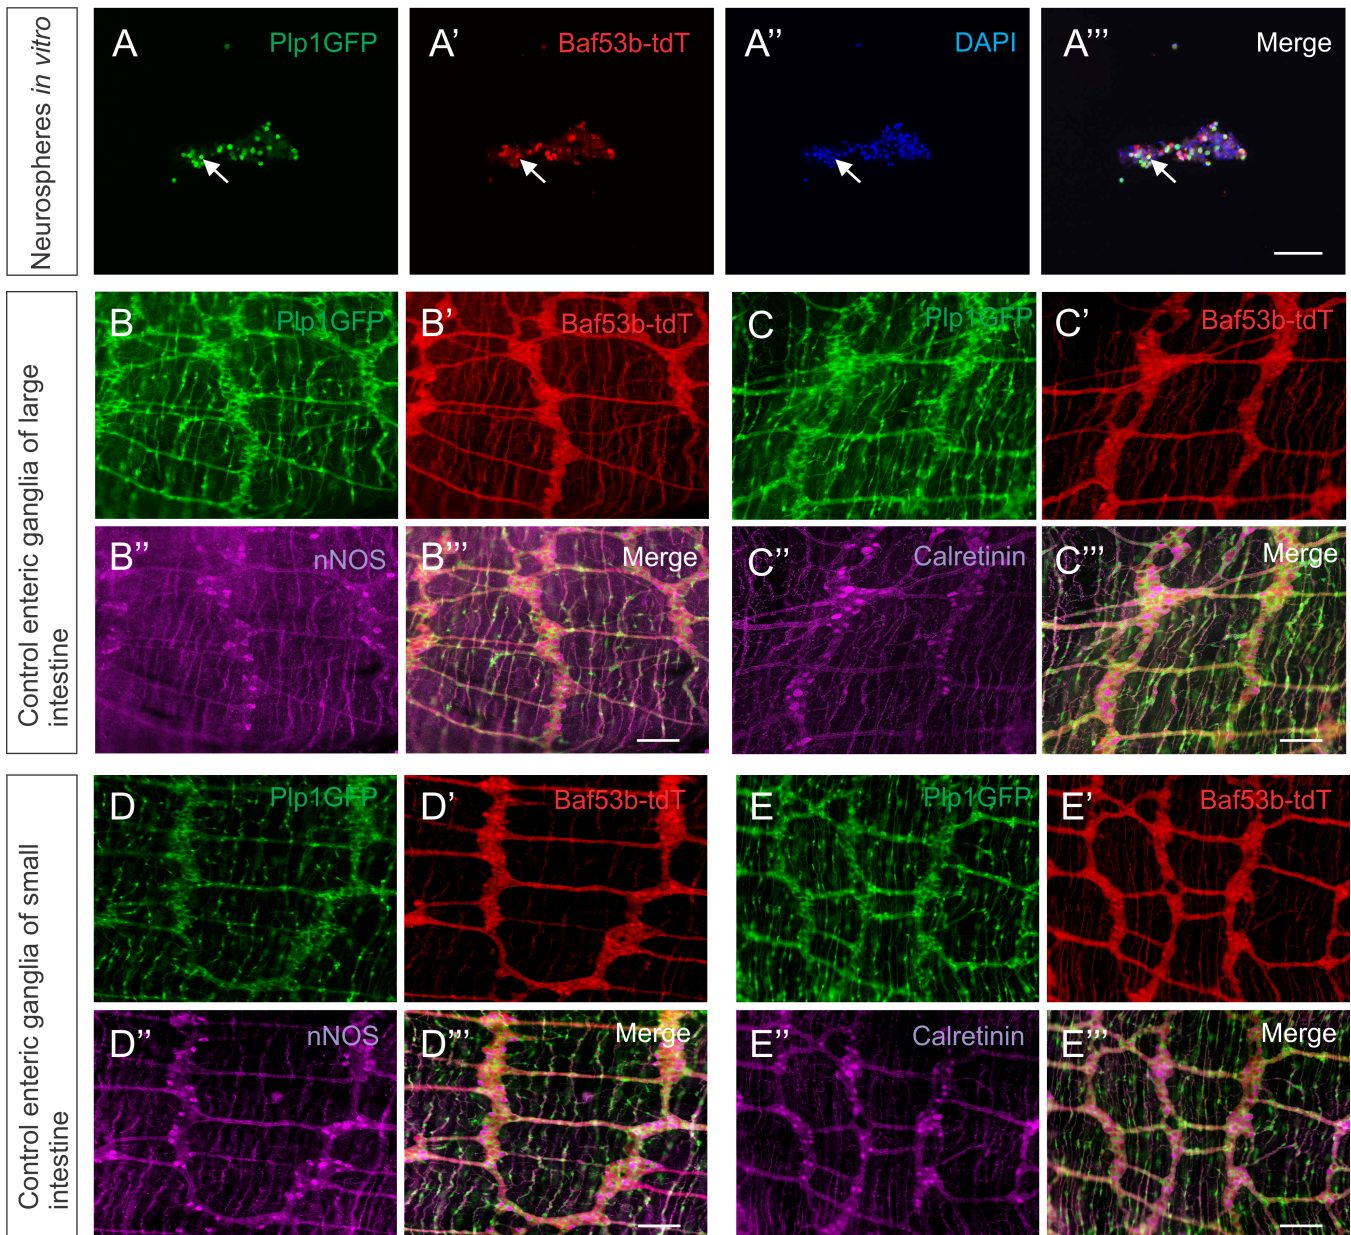

**Supplementary Figure 2. Immunohistochemical characterization of ENSCs in culture and of enteric ganglia of wildtype mice.**

Immunohistochemical evaluation of neurospheres isolated from the small intestine of Plp1GFP;Baf53b-tdT mice (A), and enteric ganglia of large (B-C) or small intestine (D-E) of Plp1GFP;Baf53b-tdT mice.

Scale bars: 100  $\mu$ m (A-E).

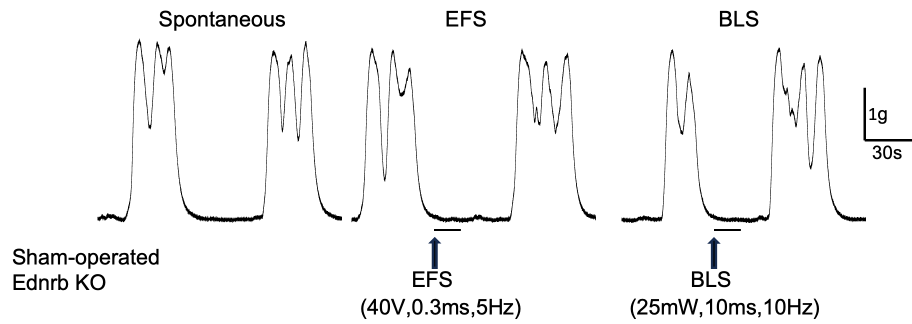

**Supplementary Figure 3. Muscle contractility of sham operated Ednrb KO mice in response to electrical or optogenetic stimulation.**

Representative traces of smooth muscle contractions during the “spontaneous”, after “EFS”, and “BLS”.

EFS, electrical field stimulation; BLS, blue light stimulation.

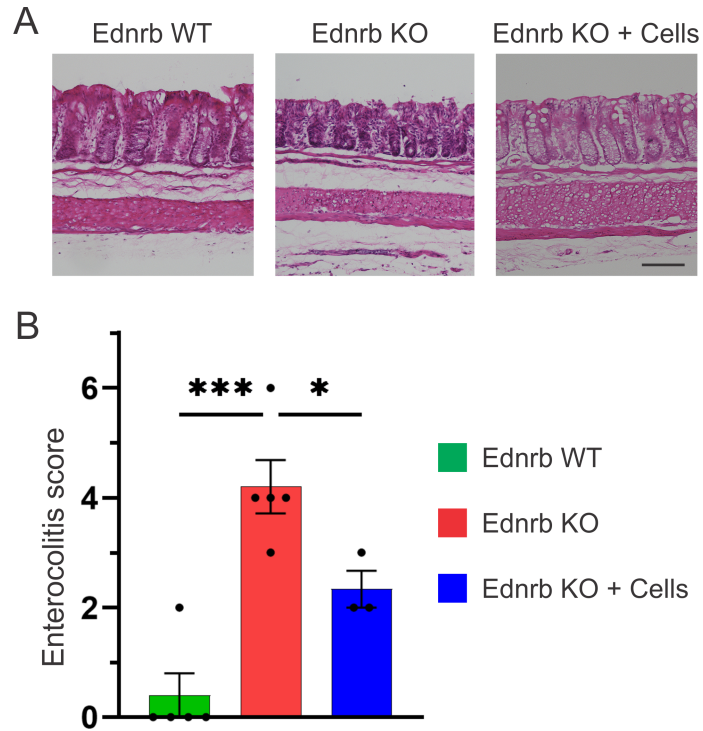

**Supplementary Figure 4. ENSC transplantation reduces colonic inflammation and restores altered epithelial architectures in Ednrb KO mice.**

(A) Histological examinations of distal colon of Ednrb WT, KO, or KO mice with ENSC therapy were performed and enterocolitis scores were evaluated (B).

All the values represent the mean of 2-4 animals for each group, repeated 2-3 times, and error bars represent the SEM. Statistical significance was determined by the one-way ANOVA with a post-hoc Tukey's test and  $P$  values \*\*\* $P < 0.001$ , \* $P < 0.05$  are statistically significant.
